# Supplementary material for: Insights into the cellular lipid cascade of prostate cells explored using infrared microspectroscopy
Source: Royal Society of Chemistry journal article supplement (doi:10.1039/d5an00126a), 2025-01-01
Supplement: d5an00126a1.pdf [file d5an00126a1.pdf]

## Supplementary

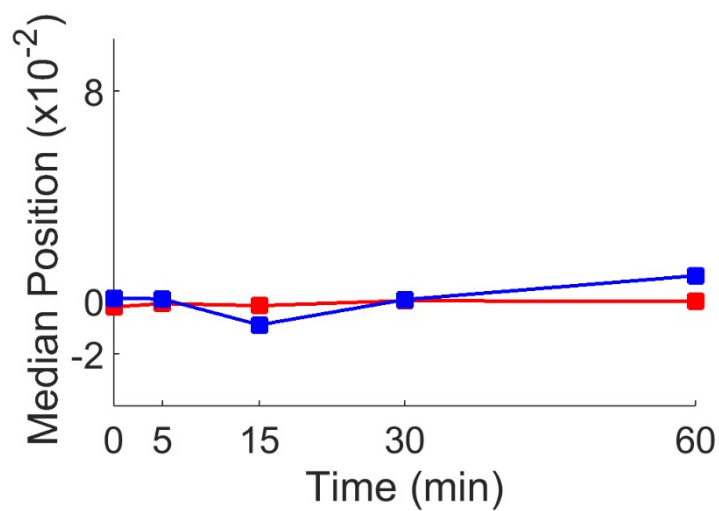

**Figure S1 PCA scores median cluster position plots of FTIR spectra, examining the C=O stretch between 1720 cm<sup>-1</sup> – 1750 cm<sup>-1</sup> from PC-3 cells lines treated with cyclodextrin only (blue) and COX-2 inhibited treated with cyclodextrin (red)**

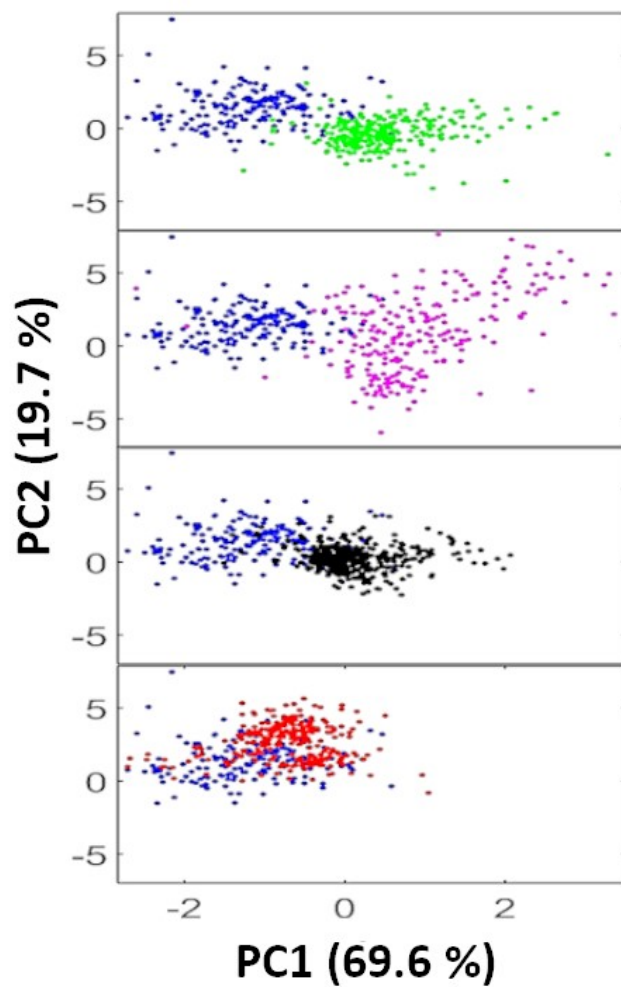

**Figure S2.** PCA scores of FTIR spectra, examining the C=O stretch between  $1720\text{ cm}^{-1}$  –  $1750\text{ cm}^{-1}$  for the invasive cell line LNCaP C4-2B treated with AA at time points (a) t=0 min (blue) vs t=5 min (green) and (b) t=0 min (blue) vs t=15 min (magenta) and (c) t=0 min (blue) vs t=30 min (black) and (d) t=0 min (blue) vs t=60 min (red).

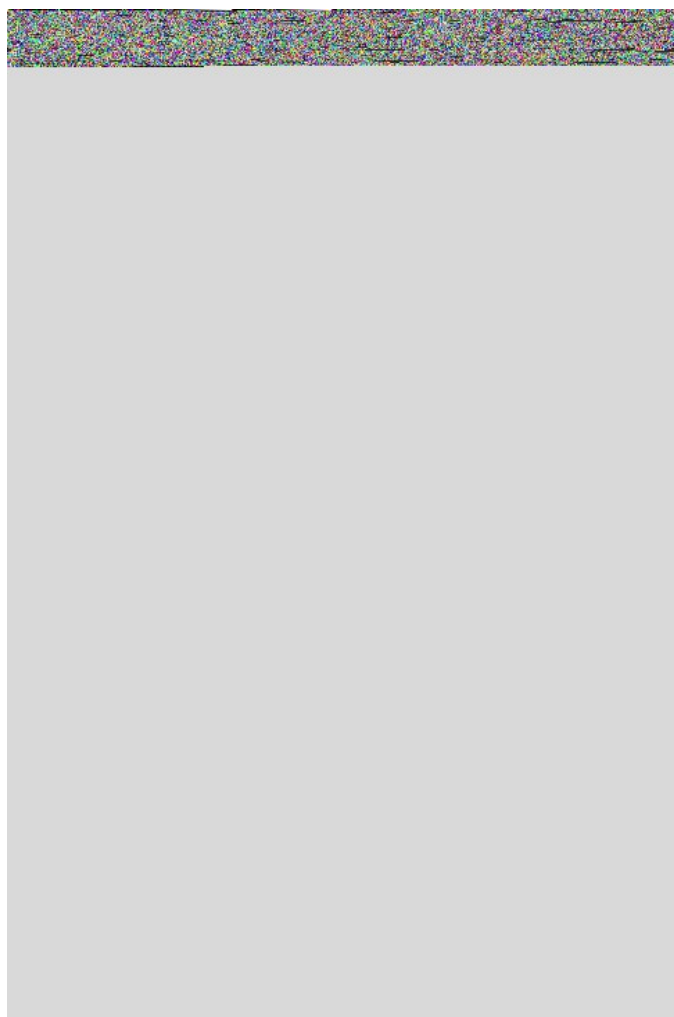

**Figure S3.** PCA scores of FTIR spectra, examining the C=O stretch between  $1720\text{ cm}^{-1}$  –  $1750\text{ cm}^{-1}$  for the invasive cell line LNCaP C4-2 treated with AA at time points (a)  $t=0$  min (blue) vs  $t=5$  min (green) and (b)  $t=0$  min (blue) vs  $t=15$  min (magenta) and (c)  $t=0$  min (blue) vs  $t=30$  min (black) and (d)  $t=0$  min (blue) vs  $t=60$  min (red).

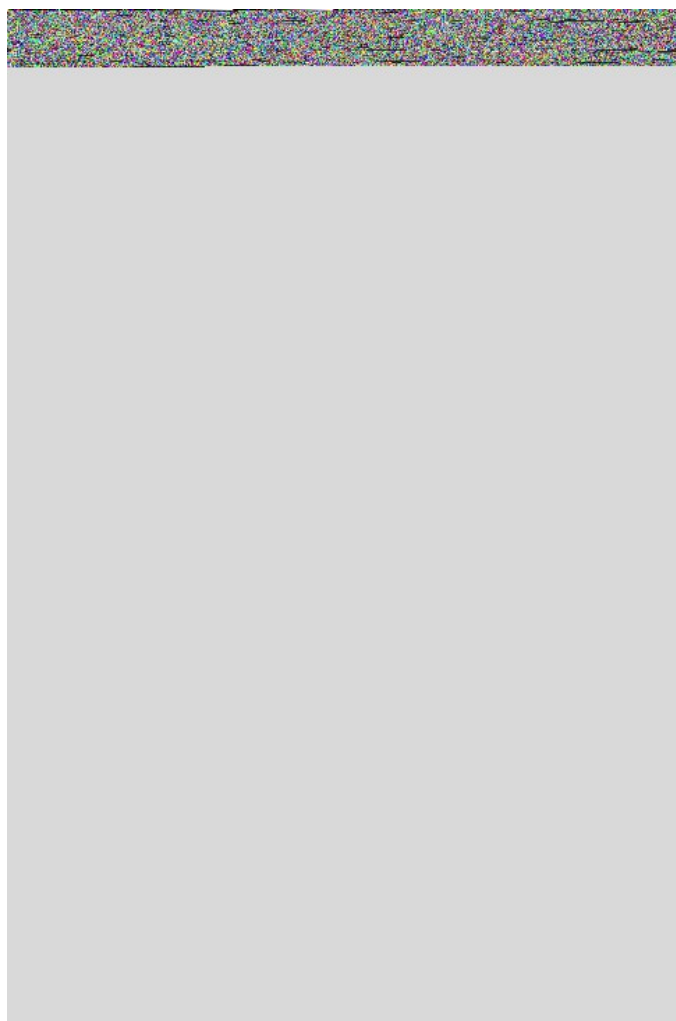

**Figure S4.** PCA scores of FTIR spectra, examining the C=O stretch between  $1720\text{ cm}^{-1} - 1750\text{ cm}^{-1}$  for the invasive cell line DU-145 treated with AA at time points (a)  $t=0\text{ min}$  (blue) vs  $t=5\text{ min}$  (green) and (b)  $t=0\text{ min}$  (blue) vs  $t=15\text{ min}$  (magenta) and (c)  $t=0\text{ min}$  (blue) vs  $t=30\text{ min}$  (black) and (d)  $t=0\text{ min}$  (blue) vs  $t=60\text{ min}$  (red).

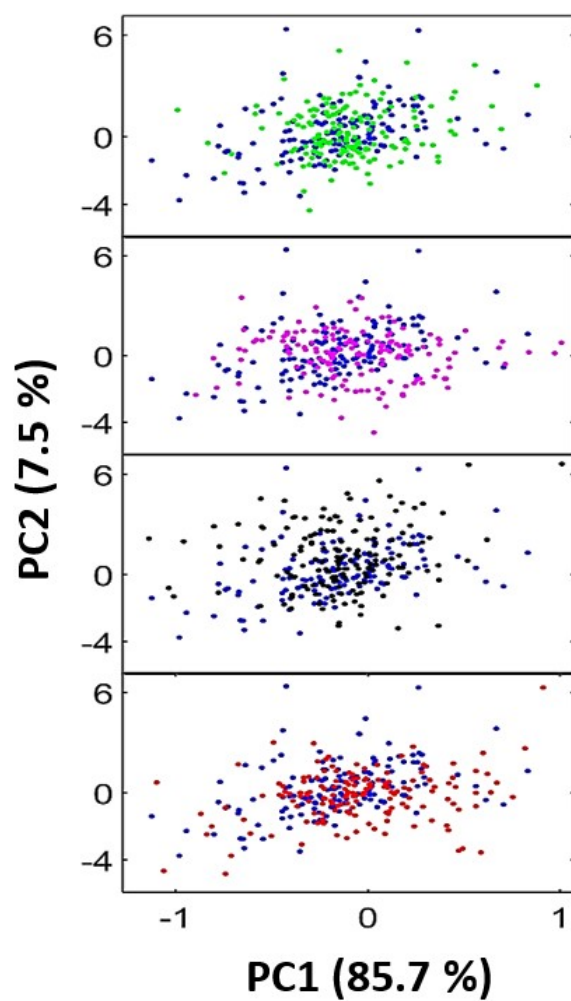

**Figure S5.** PCA scores of FTIR spectra, examining the C=O stretch between  $1720\text{ cm}^{-1}$  –  $1750\text{ cm}^{-1}$  for the non-invasive cell line PNT2 treated with AA at time points (a) t=0 min (blue) vs t=5 min (green) and (b) t=0 min (blue) vs t=15 min (magenta) and (c) t=0 min (blue) vs t=30 min (black) and (d) t=0 min (blue) vs t=60 min (red).

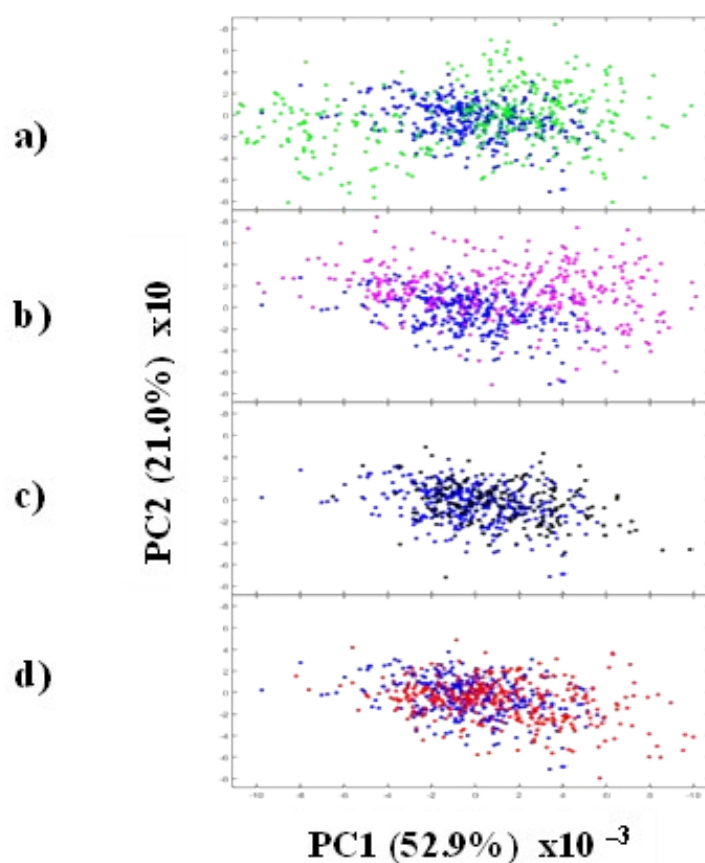

**Figure S6.** PCA scores of FTIR spectra, examining the C=O stretch between  $1720\text{ cm}^{-1}$  –  $1750\text{ cm}^{-1}$  for the non-invasive cell line LNCaP treated with AA at time points (a)  $t=0$  min (blue) vs  $t=5$  min (green) and (b)  $t=0$  min (blue) vs  $t=15$  min (magenta) and (c)  $t=0$  min (blue) vs  $t=30$  min (black) and (d)  $t=0$  min (blue) vs  $t=60$  min (red).

**Table S1 Scratch assay data for PC-3 cells treated with AA**

| PC-3 Treated with AA |                                |                               |                 |                        |
|----------------------|--------------------------------|-------------------------------|-----------------|------------------------|
| Scratch              | Average Width Before Treatment | Average Width After Treatment | Migration Index | Percentage Closure (%) |
| 1                    | 453.7                          | 182.7                         | 271.0           | 59.7                   |
| 2                    | 416.2                          | 205.1                         | 211.1           | 50.7                   |
| 3                    | 408.4                          | 225.3                         | 183.1           | 44.8                   |
| 4                    | 416.3                          | 214.3                         | 202.0           | 48.5                   |

**Table S2 Scratch assay data for PC-3 cells treated with AA and COX-2 inhibited**

| PC-3 COX-2 Inhibited Treated with AA |                                      |                                     |                    |                           |
|--------------------------------------|--------------------------------------|-------------------------------------|--------------------|---------------------------|
| Scratch                              | Average Width<br>Before<br>Treatment | Average Width<br>After<br>Treatment | Migration<br>Index | Percentage<br>Closure (%) |
| 1                                    | 359.9                                | 332.1                               | 27.8               | 7.7                       |
| 2                                    | 186.7                                | 171.8                               | 14.8               | 7.9                       |
| 3                                    | 365.6                                | 334.5                               | 31.1               | 8.5                       |
| 4                                    | 186.5                                | 164.2                               | 22.2               | 11.9                      |
